# Supplementary material
Source: MDPI journal article supplement (https://www.mdpi.com/2073-4433/10/7/411)
Supplement: s1 [file s1]

## Supplementary Materials

**Table S1.** Toxicity Value of hazardous VOCs from biogas digestate storage<sup>1</sup>

| Chemical Name         | Assessment Type | Critical Effect or Tumor Type                                                 | Weight of Evidence (WOE ) Characterization | Toxicity Value Type | Toxicity Value                                                          |
|-----------------------|-----------------|-------------------------------------------------------------------------------|--------------------------------------------|---------------------|-------------------------------------------------------------------------|
| 1,2-Dichloroethane    | Cancer          | Hemangiosarcomas                                                              | B2 <sup>2</sup>                            | IUR <sup>6</sup>    | 2.6x10 <sup>-5</sup><br>per ug/m <sup>3</sup>                           |
| 1,1,2-Trichloroethane | Cancer          | Hepatocellular carcinoma                                                      | C <sup>3</sup>                             | IUR                 | 1.6x10 <sup>-5</sup><br>per ug/m <sup>3</sup>                           |
| Tetrachloroethane     | Cancer          | Hepatocellular adenoma or carcinoma                                           | C                                          | IUR                 | 7.4x10 <sup>-6</sup><br>per ug/m <sup>3</sup>                           |
| Vinyl chloride        | Cancer          | Liver angiosarcomas, angiomas, hepatomas, and neoplastic nodules              | A <sup>4</sup>                             | IUR                 | 4.4x10 <sup>-6</sup><br>per ug/m <sup>3</sup>                           |
| Carbon tetrachloride  | Cancer          | Pheochromocytoma                                                              | L <sup>5</sup>                             | IUR                 | 6x10 <sup>-6</sup><br>per ug/m <sup>3</sup>                             |
| Benzene               | Cancer          | Leukemia                                                                      | A                                          | IUR                 | 7.8x10 <sup>-6</sup> &<br>2.2x10 <sup>-6</sup><br>per ug/m <sup>3</sup> |
|                       | Noncancer       | Decreased lymphocyte count                                                    | n/a                                        | RfC <sup>7</sup>    | 3x10 <sup>-2</sup> mg/m <sup>3</sup>                                    |
| Dichloromethane       | Cancer          | Hepatocellular carcinomas or adenomas, bronchoalveolar carcinomas or adenomas | L                                          | IUR                 | 1x10 <sup>-8</sup><br>per ug/m <sup>3</sup>                             |
|                       | Noncancer       | Hepatic effects (hepatic vacuolation)                                         | n/a                                        | RfC                 | 6x10 <sup>-1</sup> mg/m <sup>3</sup>                                    |
| Trichloroethylene     | Cancer          | Renal cell carcinoma, non-Hodgkin's lymphoma, and liver tumors                | Carcinogenic to humans (2005 guidelines)   | IUR                 | 4.1x10 <sup>-6</sup><br>per ug/m <sup>3</sup>                           |

|                                  |                 |                                                                                                 |     |     |                                   |
|----------------------------------|-----------------|-------------------------------------------------------------------------------------------------|-----|-----|-----------------------------------|
|                                  | Noncancer       | Nervous, Ocular                                                                                 | n/a | RfC | $2 \times 10^{-3} \text{ mg/m}^3$ |
| 2-Butanone (Methyl ethyl ketone) | Noncancer       | Developmental toxicity (skeletal variations)                                                    | n/a | RfC | $5 \text{ mg/m}^3$                |
| Toluene                          | Noncancer       | Neurological effects in occupationally-exposed workers                                          | n/a | RfC | $5 \text{ mg/m}^3$                |
| Methyl methacrylate              | Noncancer       | Degeneration/ atrophy of olfactory epithelium (male rats)                                       | n/a | RfC | $7 \times 10^{-1} \text{ mg/m}^3$ |
| 1,1-Dichloroethylene             | Noncancer       | Liver toxicity (fatty change)                                                                   | n/a | RfC | $2 \times 10^{-1} \text{ mg/m}^3$ |
| Carbon disulfide                 | Noncancer       | Peripheral nervous system dysfunction                                                           | n/a | RfC | $7 \times 10^{-1} \text{ mg/m}^3$ |
| n-Hexane                         | Noncancer       | Peripheral neuropathy (decreased MCV at 12 weeks)                                               | n/a | RfC | $7 \times 10^{-1} \text{ mg/m}^3$ |
| 1,2-Dichloropropane              | Noncancer       | Hyperplasia of the nasal mucosa                                                                 | n/a | RfC | $4 \times 10^{-3} \text{ mg/m}^3$ |
| Methyl chloride                  | Noncancer       | Cerebellar lesions                                                                              | n/a | RfC | $9 \times 10^{-2} \text{ mg/m}^3$ |
| Naphthalene                      | Noncancer       | Nasal effects: hyperplasia and metaplasia in respiratory and olfactory epithelium, respectively | n/a | RfC | $3 \times 10^{-3} \text{ mg/m}^3$ |
| Vinyl acetate                    | Noncancer       | Nasal epithelial lesions                                                                        | n/a | RfC | $2 \times 10^{-1} \text{ mg/m}^3$ |
| Styrene                          | Noncancer       | CNS effects                                                                                     | n/a | RfC | $1 \text{ mg/m}^3$                |
| o-Xylene                         | ND <sup>8</sup> |                                                                                                 |     |     |                                   |
| Pentane                          | ND              |                                                                                                 |     |     |                                   |
| Propylene                        | ND              |                                                                                                 |     |     |                                   |

Note: <sup>1</sup> Data sources are from EPA's Integrated Risk Information System (IRIS) (<https://cfpub.epa.gov/ncea/iris/search/index.cfm>)

<sup>2</sup> Probable human carcinogen - based on sufficient evidence of carcinogenicity in animals (1986 guidelines);

<sup>3</sup> Possible human carcinogen (1986 guidelines);

<sup>4</sup> Human carcinogen (1986 guidelines) Known/likely human carcinogen (1996 guidelines);

<sup>5</sup> Likely to be carcinogenic to humans (2005 guidelines);

<sup>6</sup> Inhalation Unit Risk, per  $\text{ug/m}^3$ ;

<sup>7</sup> Reference Concentration,  $\text{mg/m}^3$ ;

<sup>8</sup> ND, no data.

**Table S2.** The calibration equation, RSD, R<sup>2</sup> and method detection limits (MDL) of GC-MS for top 20 most abundant VOC species detected in this study

| VOCs                  | Calibration equation | RSD (%) | R <sup>2</sup> | MDL (ppb) |
|-----------------------|----------------------|---------|----------------|-----------|
| Ethanol               | -                    | -       | -              | -         |
| Propylene             | y=940800x-7414       | 0.9999  | 0.9999         | 0.05      |
| Acetone               | -                    | -       | -              | 0.05      |
| 2-Butanone            | -                    | -       | -              | 0.05      |
| 1,2-Dichloroethane    | y=1.992x             | 3       | 0.9985         | 0.05      |
| Toluene               | y=1.236x             | 9.8     | 0.9965         | 0.05      |
| Methyl methacrylate   | y=0.1947x            | 20.6    | 0.9954         | -         |
| FREON11               | -                    | -       | -              | 0.3       |
| Dichloromethane       | y=0.6916x            | 4.5     | 0.9978         | 0.3       |
| Carbon disulfide      | y=1.788x             | 10.7    | 0.9945         | 0.05      |
| n-Hexane              | y=0.3130x            | 9.4     | 0.9973         | 0.05      |
| 1,2-Dichloropropane   | y=0.1750x            | 10.1    | 0.9971         | 0.05      |
| Methyl cyclopentane   | y=0.1809x            | 12.7    | 0.9976         | 0.05      |
| Ethyl acetate         | y=0.3330x            | 4.9     | 0.9944         | 0.05      |
| 1,1,2-Trichloroethane | y=0.3736x            | 4.2     | 0.9949         | 0.05      |
| FREON12               | -                    | -       | -              | 0.3       |
| Methyl sulfide        | -                    | -       | -              | -         |
| Four chloroethane     | y=0.7657x            | 7.9     | 0.9973         | 0.01      |
| n-Butane              | y=0.5416x            | 10.9    | 0.9967         | 0.3       |
| Trichloromethane      | y=0.5350x            | 3.2     | 0.9982         | 0.1       |
